# Supplementary material for: Improving the performance of inorganic perovskite solar cells via the perovskite quantum dot dynamically mediated film growth method
Source: Royal Society of Chemistry journal article supplement (doi:10.1039/d1cp05809f), 2022-01-01
Supplement: d1cp05809f2.pdf [file d1cp05809f2.pdf]

## Supplementary Information

### Improving the performance of inorganic perovskite solar cells by perovskite quantum dots dynamic assisted film growth method

Yifan Liu <sup>a#</sup>, Fei Zheng <sup>a#</sup>, Longlong Zhang <sup>a</sup>, Weihua Ren <sup>a</sup>, Zetong Sunli <sup>a</sup>, Yufei Ma <sup>a</sup>, Yuying Hao <sup>a\*</sup>

<sup>a</sup> College of Physics and Optoelectronics, Key Lab of Advanced Transducers and Intelligent Control System, Taiyuan University of Technology, Taiyuan 030024, China.

\*Corresponding author. E-mail address: haoyuying@tyut.edu.cn

<sup>#</sup>These authors contributed equally to this work and should be considered co-first authors.

---

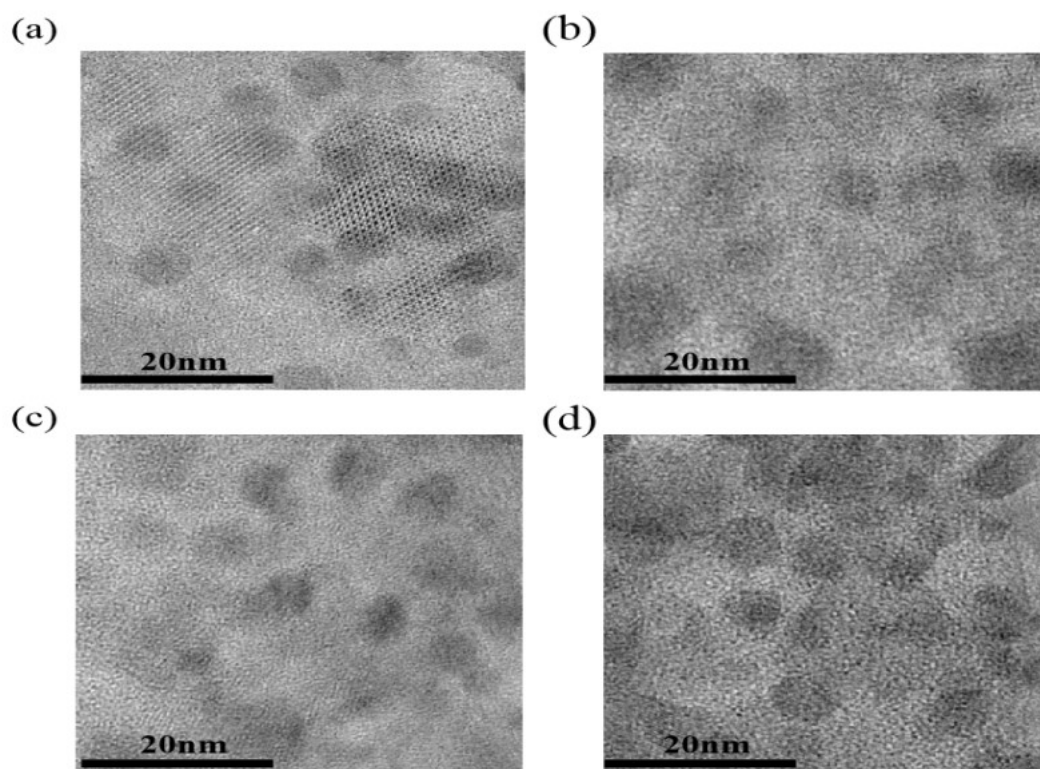

F

Fig. S1 TEM images of CsPbI<sub>3</sub>:Ce<sub>x</sub> QDs (a) x=0, (b) x=5%, (c) x=10%, (d) x=15% (mass ratio).

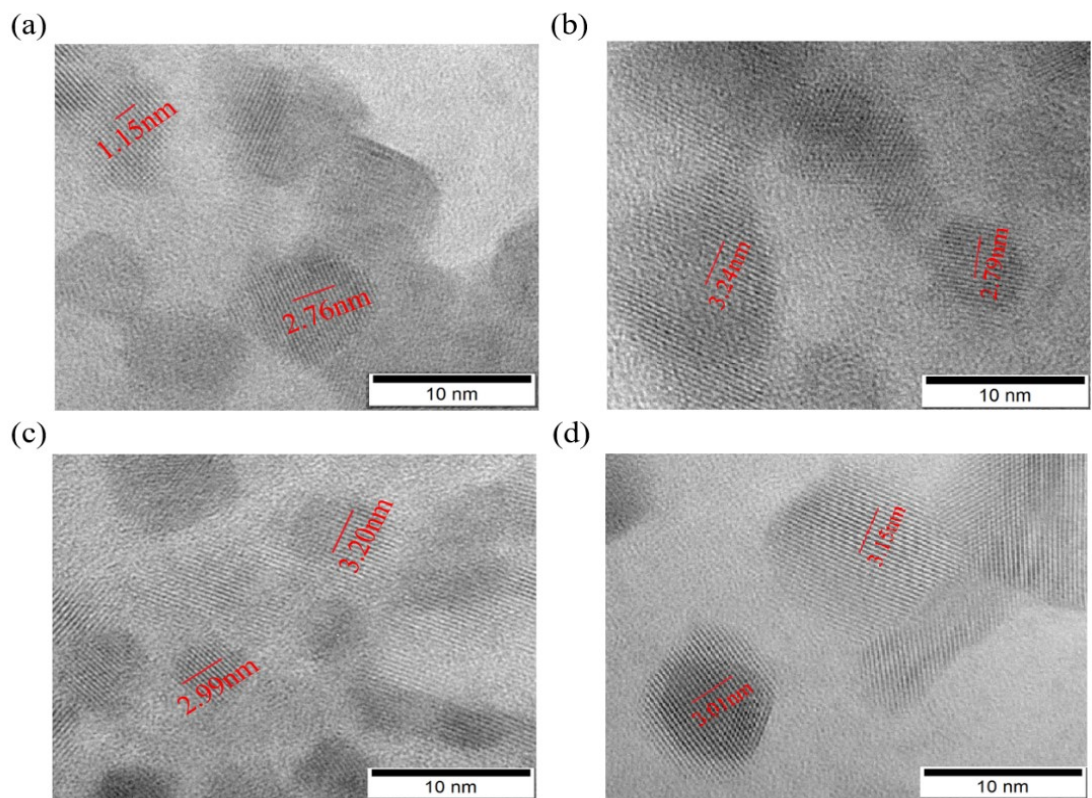

Fig. S2 TEM image of the lattice spacing values of CsPbI<sub>3</sub>:Ce<sub>x</sub> QDs (a) x=0, (b) x=5%, (c) x=10%, (d) x=15% (mass ratio).

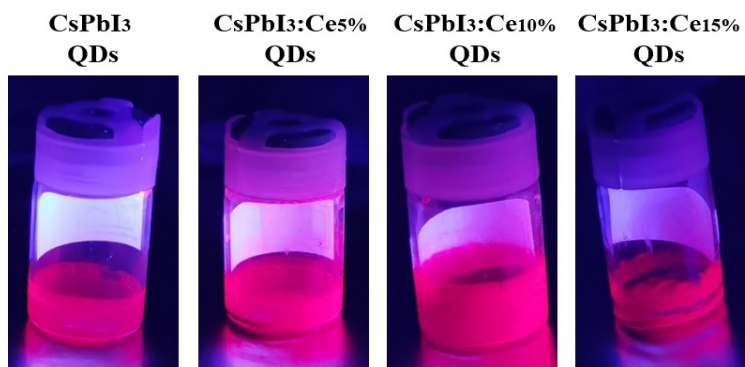

Fig. S3 Photography picture of PQDs under ultraviolet light.

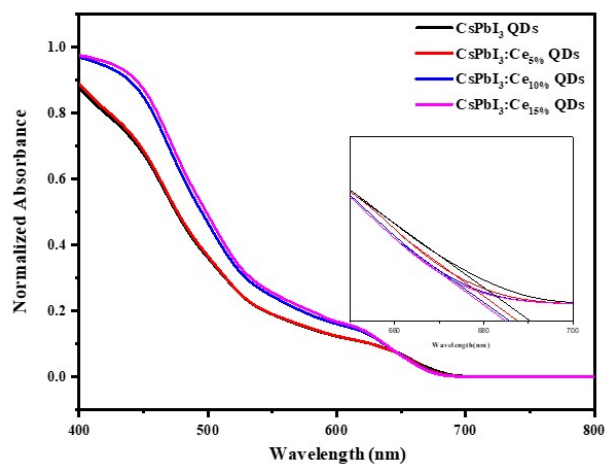

Fig. S4 Normalized UV-Vis absorption spectra of PQDs in toluene solution.

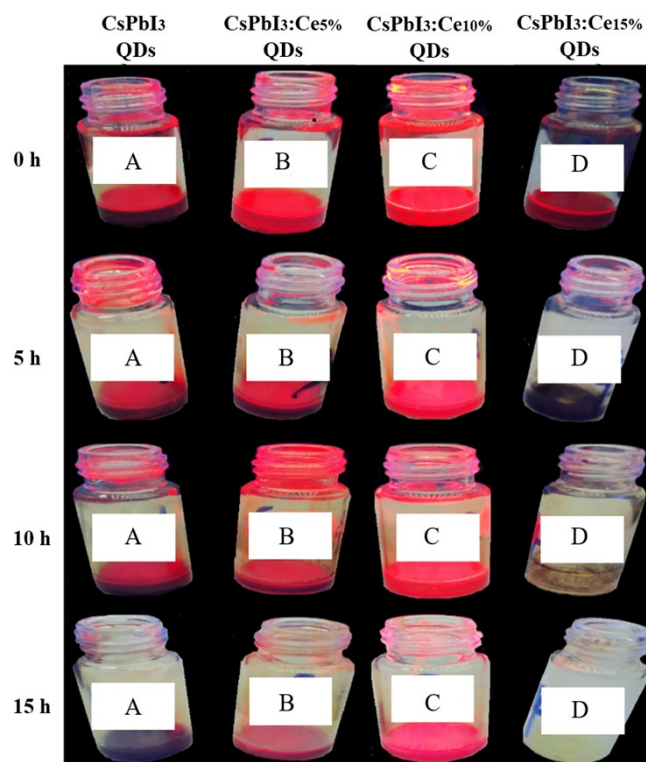

Fig. S5 The evolution of fluorescence effect of CsPbI<sub>3</sub>:Ce<sub>x</sub> QDs in octane solutions at 125 °C under 365 nm ultraviolet light.

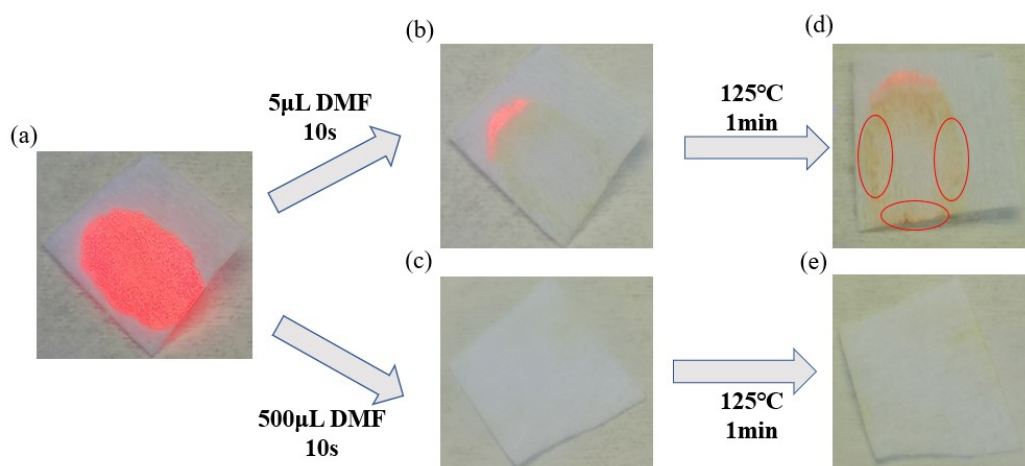

Fig. S6 Solvent stability test of PQDs under 365 nm ultraviolet light.

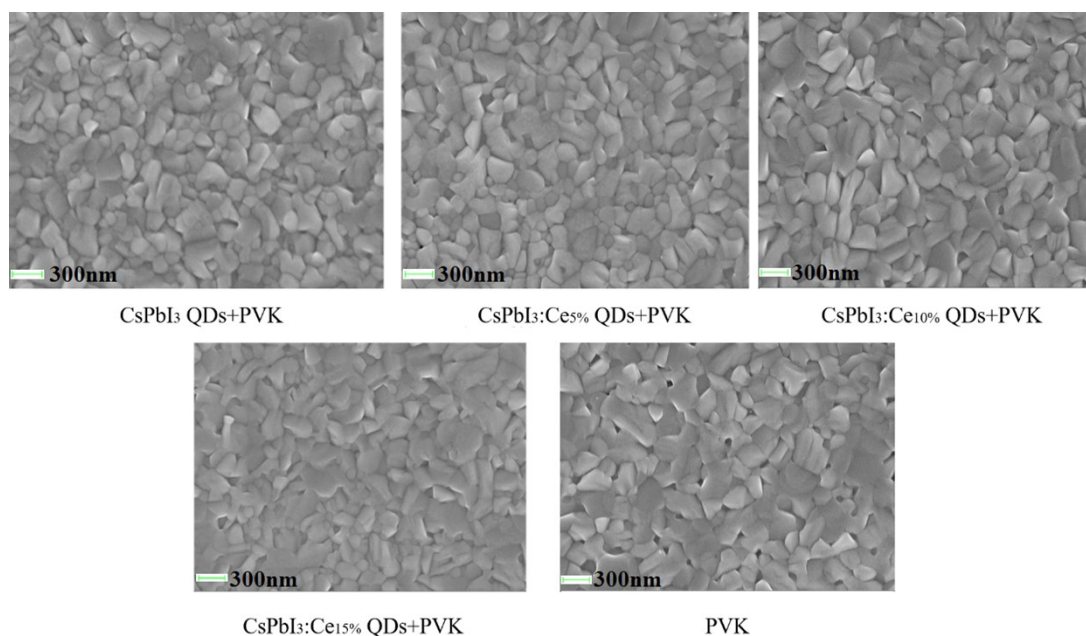

Fig. S7 Surface SEM images of perovskite film prepared with and without PQDs.

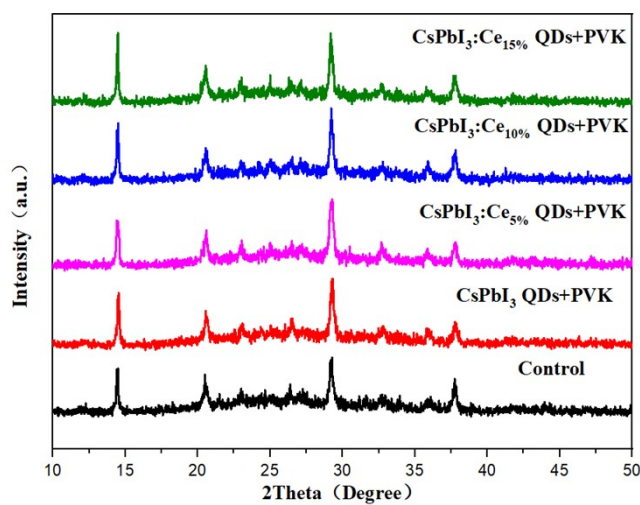

Fig. S8 XRD images of perovskite film prepared with and without PQDs.

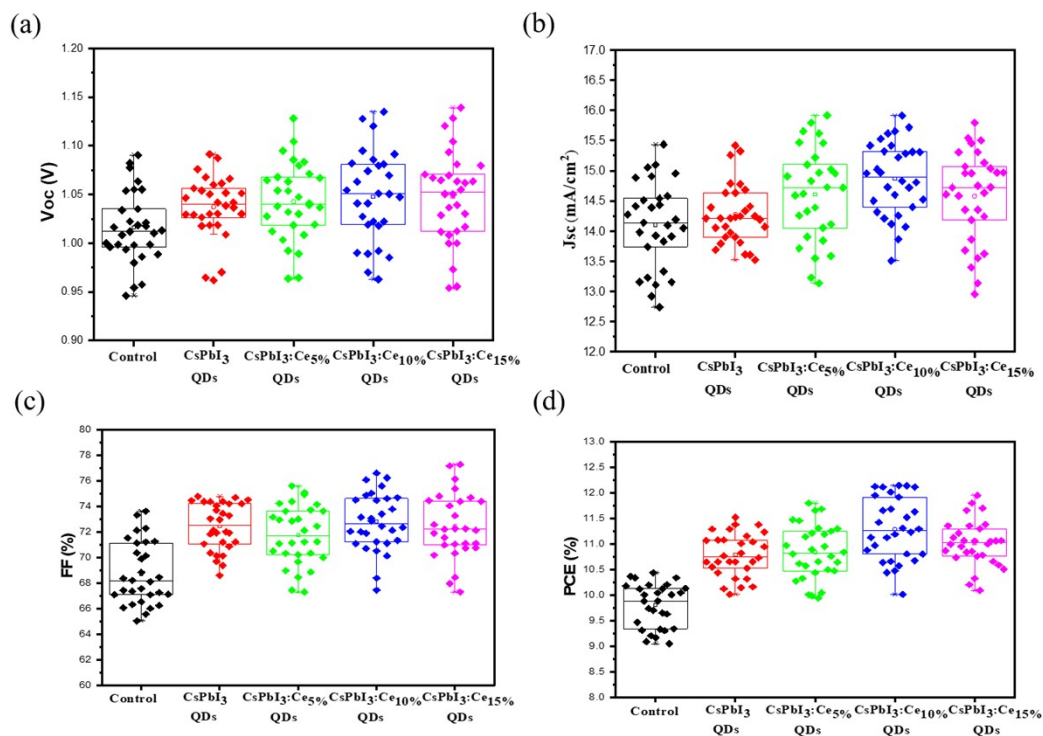

Fig. S9 Statistics distributions of (a)  $V_{oc}$ , (b)  $J_{sc}$ , (c)  $FF$  and (d)  $PCE$  of the 30  $CsPbI_2Br$ -based PSCs for each kind prepared with and without PDMG process.

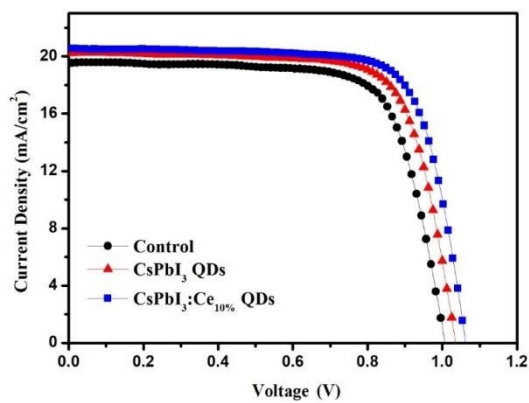

Fig. S10 J-V curves of  $CsPbI_3$ -based PSCs prepared with and without PDMG process.

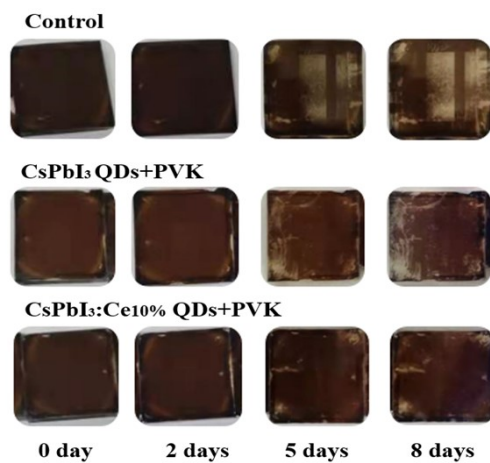

Fig. S11 The stability tests of CsPbI<sub>2</sub>Br-based perovskite film made with or without PQDs in air environment (20-25 °C, 25-30% RH).

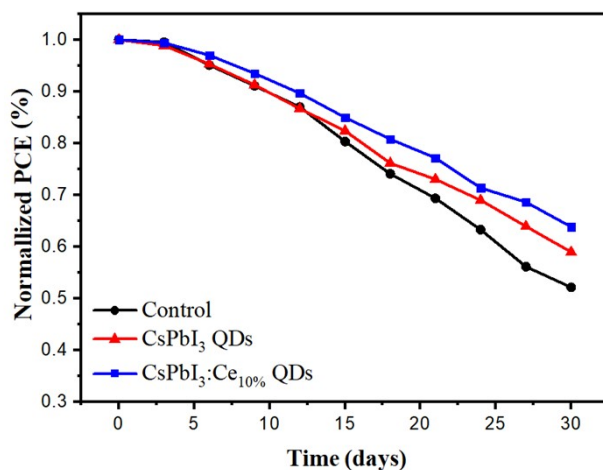

Fig. S12 Long-term stability tests of CsPbI<sub>2</sub>Br-based PSCs made with or without PQDs in N<sub>2</sub> glove box for 30 days.

Table S1 A summary of the cell parameters measured for a set of 20 CsPbI<sub>3</sub>-based PSCs

|                                                  | $V_{oc}$ (V) | $J_{sc}$ (mA/cm <sup>2</sup> ) | $FF$        | PCE (%)    |
|--------------------------------------------------|--------------|--------------------------------|-------------|------------|
| Control PVK                                      | 1.006±0.022  | 19.537±0.31                    | 0.733±0.015 | 14.43±0.50 |
| CsPbI <sub>3</sub><br>QDs PVK                    | 1.035±0.023  | 20.224±0.36                    | 0.740±0.020 | 15.49±0.36 |
| CsPbI <sub>3</sub> :Ce <sub>10%</sub><br>QDs PVK | 1.062±0.034  | 20.550±0.44                    | 0.749±0.011 | 16.38±0.32 |
